# Supplementary material
Source: Springer Nature journal article supplement (https://www.springermedizin.de/resource/supplementary/12888_2008_514_MOESM4_ESM.pdf/9483474)

Deliberate self harm (lifetime prevalence) in men and women

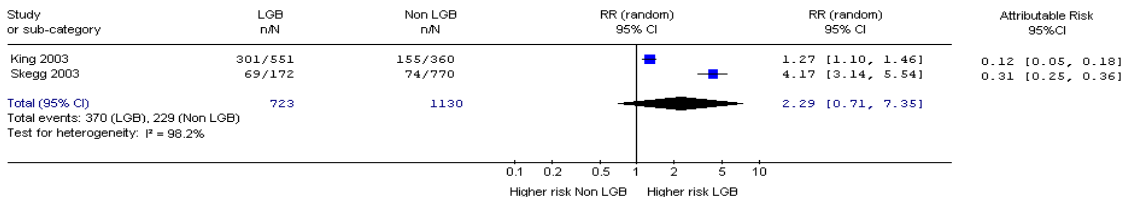

Deliberate self harm (lifetime prevalence) in men only

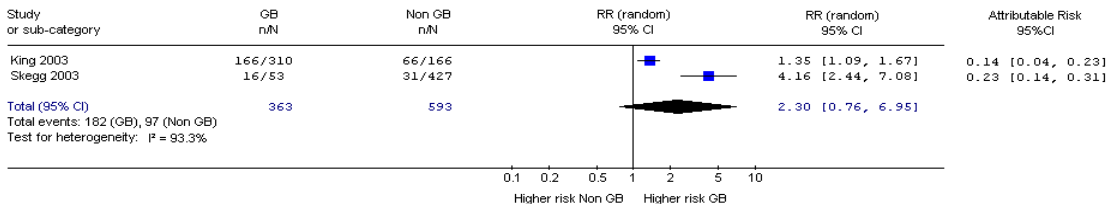

Deliberate self harm (lifetime prevalence) in women only

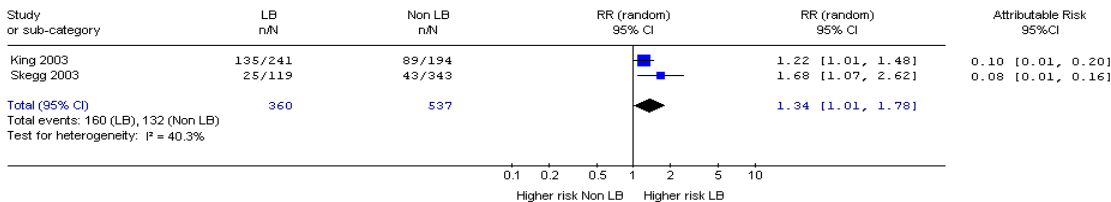

Supplement: MOESM4 [file 9483474]
